# Supplementary material
Source: PubMed Central journal article supplement (PMC4251498)

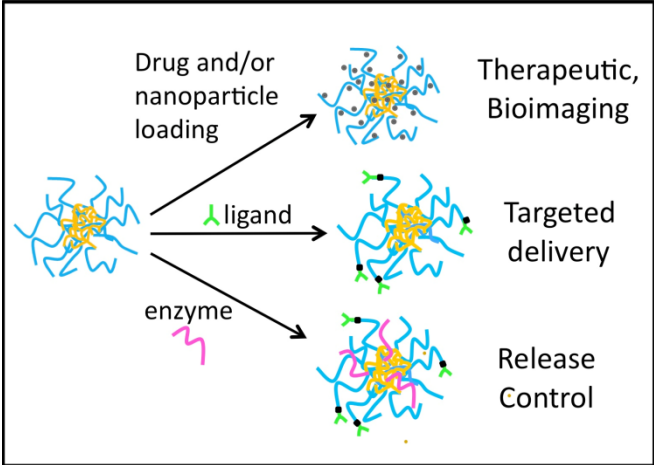

Supplement: NIHMS631143-supplement-Supplementary_Information.pdf [file NIHMS631143-supplement-Supplementary_Information.pdf]
